Manuscript title page

1. Manuscript title: Contribution of the axon initial segment to action potentials recorded extracellularly.
2. Abbreviated Title: Impact of AIS on extracellular action potentials.
3. Author names and affiliation, including postal codes:

Maria Teleńczuk, Unité de Neurosciences, Information et Complexité, CNRS, 91190 Gif-sur-Yvette, Paris

Romain Brette, Sorbonne Universités, INSERM, CNRS, Institut de la Vision, 17 rue Moreau, F-75012 Paris, France

Alain Destexhe, Unité de Neurosciences, Information et Complexité, CNRS, 91190 Gif-sur-Yvette, Paris

Bartosz Teleńczuk, Unité de Neurosciences, Information et Complexité, CNRS, 91190 Gif-sur-Yvette, Paris

4. Corresponding author with complete address:

Maria Teleńczuk, Unité de Neurosciences, Information et Complexité, CNRS, 91190 Gif-sur-Yvette, Paris

e-mail: [mtelenczuk@unc.cnrs-gif.fr](mailto:mtelenczuk@unc.cnrs-gif.fr)

phone number: 0033-169-824-177

5. Author Contributions:

Conceptualization: MT, RB, AD, BT.

Performed the modelling: MT, BT.

Analysed the data: MT, BT.

Wrote the paper: MT, RB, AD, BT.

6. Keywords:

axon initial segment, extracellular action potential, computational modelling

## 1 **Abstract**

2 Action potentials (APs) are electric phenomena that are recorded both intra-  
3 cellularly and extracellularly. APs are usually initiated in the short segment  
4 of the axon called the axon initial segment (AIS). It was recently proposed  
5 that at onset of an AP the soma and the AIS form a dipole. We study the  
6 extracellular signature (the extracellular action potential, EAP) generated  
7 by such a dipole. First, we demonstrate the formation of the dipole and its  
8 extracellular signature in detailed morphological models of a reconstructed  
9 pyramidal neuron. Then, we study the EAP waveform and its spatial de-  
10 pendence in models with axonal AP initiation and contrast it with the EAP  
11 obtained in models with somatic AP initiation. We show that in the models  
12 with axonal AP initiation the dipole forms between somatodendritic compart-  
13 ments and the AIS, and not between soma and dendrites as in the classical  
14 models. Soma-dendrites dipole is present only in models with somatic AP  
15 initiation. Our study has consequences for interpreting extracellular record-  
16 ings of single-neuron activity and determining electrophysiological neuron  
17 types, but also for better understanding the origins of the high-frequency  
18 macroscopic electric fields recorded in the brain.

## 19 **New & Noteworthy**

20 We studied the consequences of the action potential (AP) initiation site on  
21 the extracellular signatures of APs. We show that: (1) at the time of AP

22 initiation the action initial segment (AIS) forms a dipole with the soma,  
23 (2) the width but not (3) amplitude of the extracellular AP generated by  
24 this dipole increases with the soma-AIS distance. This may help to monitor  
25 dynamic changes in the AIS position in experimental in vivo recordings.

## 26 **Introduction**

27 Action potentials (APs) are the main output of neuronal computation arising  
28 due to neuronal membrane excitability. The most direct method to detect  
29 APs is by intracellular recordings for which a glass pipette is inserted into the  
30 soma. However, the sample size of neurons recorded with this technique is  
31 limited. Another method of AP detection uses extracellular electrodes whose  
32 densities can be greatly increased thanks to the silicon technology opening  
33 the possibility of massive recordings from large samples of neurons (Jun et al.,  
34 2017; Stevenson and Kording, 2011). The drawback of this method is that  
35 the discrimination of separate neurons and their types based on extracellular  
36 recordings is not trivial (Barthó et al., 2004) and requires a detailed model  
37 of how the extracellular signature of the APs is generated.

38 APs also contribute to the local field potentials (LFP) and electroen-  
39 cephalograms (EEG) recorded far from the neuronal source. In particular,  
40 the high-frequency components of these signals can relate to the firing rates  
41 of large population of neurons (Reimann et al., 2013). These high-frequency  
42 local field potentials are also known to be sensitive to the neuronal responses

43 at single-neuron and single-trial level (Telenczuk et al., 2015). Therefore,  
44 APs can be as important as the passive dendritic and synaptic currents for  
45 understanding the LFP or EEG and in particular their high-frequency com-  
46 ponents.

47 The extracellular signature of APs has been a topic of computational  
48 studies (Bédard et al., 2004; Gold et al., 2006; Milstein and Koch, 2008).  
49 These studies emphasize the role of passive currents and dendritic compart-  
50 ments in the generation of the action potentials. However, in most of those  
51 models APs were initiated in the soma. It is now well established that the  
52 AP often initiates in the axon initial segment (AIS) (Stuart et al., 1997a;  
53 Stuart et al., 1997b), which gives a characteristic kink at the AP onset when  
54 recorded somatically (Naundorf et al., 2007). This kink can be explained by  
55 the “critical resistive coupling model”, according to which the AP is initiated  
56 through the strong resistive coupling between a small AIS and a large soma  
57 (Brette, 2013; Telenczuk et al., 2017). In this mechanism of AP initiation,  
58 AIS and soma form effectively a current dipole.

59 We studied the contribution of the soma-AIS dipole to the extracellular  
60 field and its effect on the shape and amplitude of the extracellular action  
61 potential (EAP). In particular, we studied the EAP from realistic model  
62 neurons with AIS-based initiation and compare it with models for which  
63 the sodium channel density was modified to initiate the AP somatically.  
64 By means of computational modelling, we show that the AIS contributes  
65 significantly to the EAP. Although, the localization and length of the AIS

66 have only a minor effect on the appearance of the AP recorded intracellularly  
67 from the soma, the presence of AIS has a large impact on the shape of the  
68 EAP.

69 We believe that these findings improve our understanding of the close-  
70 field and far-field contribution of the AP to the electric fields in the brain.  
71 It will also help to interpret recordings of various signals ranging from the  
72 EAP, through LFP to EEG.

## 73 **Materials and Methods**

### 74 **Detailed morphology model**

75 We used a detailed morphology model (physiological Nav model) of the rat  
76 neocortex, layer 5 pyramidal neuron described in Hallermann et al. (2012),  
77 whose morphology and ion channels are modelled such as to give good fit  
78 to the experimental data. Most importantly, in this model action potentials  
79 initiate in the axon initial segment as is the case in real neurons. The details  
80 of the model can be found in (Hallermann et al., 2012).

81 The kinetics of the sodium channels were matched to experimental data  
82 recorded from the soma (putative Nav1.2 channel). Another sodium channel  
83 (putative Nav1.6 channel) was introduced in the axon, of which activation  
84 curve was shifted by 2 mV towards more negative potential to account for  
85 the lower threshold of AP initiation in the AIS.

86 The density of the sodium channels in the soma was  $500 \text{ pS}\mu\text{m}^{-2}$  while in

87 the AIS it varied between 1452 and 8392  $pS\mu m^{-2}$  (Fig. 2C physiological Nav  
88 model). To compare the results of the original model to the neuron where the  
89 action potential initiates in the soma, we reduced the density of the sodium  
90 channels in the AIS just below that in the soma to 480  $pS\mu m^{-2}$  throughout  
91 the length of the initial segment of the axon (70  $\mu m$ , Fig. 2C, reduced  
92 Nav model). The density of the sodium channels in the soma remained the  
93 same as in the original model (500  $pS\mu m^{-2}$ ). This was enough for an action  
94 potential to initiate in the soma. We note that there are less sodium channels  
95 in the altered model leading to lower current flow, therefore comparison of the  
96 absolute amplitudes of the extracellular potential is not possible. Therefore,  
97 where necessary, we normalized the potentials to the highest absolute value  
98 of the potential (Fig. 5 and 6).

99 To trigger the action potential we injected current to the soma. To remove  
100 signal associated with the current injection we removed all the active channels  
101 from the model and stimulated it in the same way. We then subtracted the  
102 results of the passive model from the results of each of the active models.

103 In the detailed morphology model, in all the calculations, the soma is rep-  
104 resented as a cylinder. However, in the figures we represent it as a triangular  
105 shape for easier visualisation of the morphology of the cell.

## 106 **Soma-axon model**

107 We used a simple neuron consisting of a soma (20 x 30  $\mu m$ , 6 segments)  
108 and an axon (1 x 50  $\mu m$ , 10 segments), adapted from (Yu et al., 2008).

109 Figure 8A shows the sample schematics of the shape of the neuron. The  
110 simulation was controlled from Python using the Neuron-Python interface  
111 (Hines et al., 2009).

## 112 **Linear Source Approximation**

113 To estimate the extracellular potential, we used the Linear Source Approxi-  
114 mation (LSA) method, which calculates the summed potential generated by  
115 currents originating from line sources with known sizes and positions. This  
116 method is known to be more precise than approximating the currents by  
117 point sink and sources (Holt, 1997; Wilson and Bower, 1992). We then ap-  
118 plied the LSA estimation to cylinders obtained from the segmentation by  
119 Neuron simulator (Hines and Carnevale, 1997). The field was calculated us-  
120 ing the LSA implementation of NeuronEAP Python library (Telenczuk and  
121 Telenczuk, 2016). In all calculations we used an extracellular conductivity of  
122  $0.3 \text{ Sm}^{-1}$  (Nunez and Srinivasan, 2006).

123 In Figure 8 we removed the baseline from the extracellular potential by  
124 calculating an average potential in a window of 2 to 1 ms before the peak of  
125 the action potential.

## 126 Results

### 127 AP is initiated in the AIS and gives a characteristic “kink” to the 128 somatic potential

129 To determine the contribution of an AP to the electric field recorded around  
130 the neuron, we performed simulations of a detailed reconstruction of a thick-  
131 tufted pyramidal neuron (neocortex, layer 5, rat, Fig. 1). The morphology  
132 reflected real reconstructed neurons with all neuronal compartments includ-  
133 ing an axon and dendrites. The densities and the kinetics of sodium (Na)  
134 and potassium (K) channels in soma and axon were constrained by the ex-  
135 perimental data. In particular, two different types of sodium channels were  
136 introduced (referred to as Nav1.2 and Nav1.6, see Methods) with different  
137 voltage activation threshold and different distribution of the channel density  
138 across the axosomatic axis (Fig. 2, left). Overall, this model has been found  
139 to match well the properties of AP initiation in cortical neurons (Hallermann  
140 et al., 2012; Telenczuk et al., 2017).

141 Importantly, in this model the action potential initiates distally from the  
142 soma, in the axon initial segment (AIS), and later triggers a somatic AP  
143 which is in agreement with physiological recordings (Stuart et al., 1997a).  
144 This mechanism of AP initiation gives a characteristic “kink” at the onset of  
145 the somatic AP (Fig. 3A). This is consistent with resistive coupling between  
146 the AIS and soma (Telenczuk et al., 2017). The resistive coupling model  
147 predicts that the soma and AIS form a dipole at AP initiation, which should



148 be observed in the extracellular electric field.

### 149 **AIS generates positive peak at the onset of the EAP**

150 We first characterised the waveform of the extracellular action potential  
151 (EAP). Previous models displaying somatic AP initiation have indicated that  
152 mainly sodium currents in the soma and dendrites might contribute to the  
153 initial phases of the EAP, whereas later phases are shaped by the repolari-  
154 sation mediated by potassium currents in these compartments (Gold et al.,  
155 2006). In contrast, in these models axon, distal dendrites and the capacitive  
156 current contribute little to the EAP.

157 We re-evaluated the contribution of the AP to the extracellular potential  
158 in the more realistic model with AIS-initiated AP. First, we calculated and  
159 plotted the EAP recorded in the perisomatic area covering soma, proximal  
160 dendrites and the AIS in the physiological Nav model (Fig. 4). Consistently  
161 with previous results (Gold et al., 2006), we found a large and sharp nega-  
162 tive peak, due to sodium inflow, followed by a broad positive peak, due to  
163 potassium-based repolarisation of the soma and dendrites. Interestingly, in  
164 some electrodes (around and above soma) these peaks were preceded by a  
165 sharp positive deflection reflecting strong axial currents flowing between AIS  
166 and soma at the onset of the AP.

167 To confirm that this initial positive peak is related to the resistive coupling  
168 between soma and AIS forming a dipole, we lowered the densities of sodium  
169 channels in the AIS (Fig. 2, right). As expected, this modification led to

170 the somatic initiation of the AP, which appears simultaneously at soma and  
171 AIS (these two compartments being almost isopotential), and longer AP  
172 latency due to higher threshold (Fig. 3). The EAP waveforms obtained in  
173 this modified model lack the initial positivity consistently with the results of  
174 Gold et al. (2006). We emphasise though that such a model is inconsistent  
175 with the experimental observations of AP initiation, which support axonal  
176 (AIS) rather than somatic initiation of APs.

### 177 **The AIS enhances the EAP amplitude at broad spatial ranges**

178 The peak-to-peak amplitude decays with the distance from the neuron (Fig. 5).  
179 It is highest around soma and AIS, where the largest inflow of sodium and  
180 outflow of potassium during the AP takes place. Lowering sodium channel  
181 density such that AP initiates somatically attenuates the peak-to-peak ampli-  
182 tude of the EAP, which is expected from the decrease of the total membrane  
183 current in the low-sodium model (not shown). Importantly, the reduction of  
184 EAP amplitude was most pronounced in the axonal region, especially in the  
185 proximity of the axon segment previously acting as the AIS (Fig. 6).

186 Next, we plotted the peak-to-peak amplitude of the EAP across four lines  
187 perpendicular to the somatodendritic axis (Fig. 5). Close to the neuron the  
188 profile of the EAP amplitude was non-monotonic due to the complex mor-  
189 phology of the neuron but it monotonically decreased with distance further  
190 away from the source. Again, due to the larger total membrane current  
191 the EAP amplitude is greater in standard sodium models compared to the

192 low-sodium modification across all distances.

193 **AIS contribution to EAP can be approximated by a soma-AIS**  
194 **dipole**

195 In the physiological Nav model, at the moment of AP initiation the axial  
196 current and the extracellular currents form a current loop. This current loop  
197 produces extracellular potential with dipolar configuration, i.e. negative po-  
198 tential around AIS (sink) and positive potential around soma and proximal  
199 dendrites (source, Fig. 7B). This relation is reversed during the repolarisa-  
200 tion phase of the AP during which the polarities of AIS and somatodendritic  
201 compartments are reversed (Fig. 7C). Such a configuration of sinks and  
202 sources will be referred to as soma-AIS dipole. In the model with somatic  
203 AP initiation (reduced Nav model), the soma and AIS are almost isopoten-  
204 tial so no current flows between them. In this case the soma-AIS dipole is  
205 not formed, but it is replaced by the source in the soma (or sink after the  
206 inversion) and the sink in proximal dendritic tree (soma-dendrites dipole)

207 The electric field obtained from the detailed morphological models con-  
208 tain a mixture of contributions from passive dendritic compartments and  
209 active axonal/somatic compartments giving rise to a complex configuration  
210 of current sinks and sources. To isolate the effects of the soma-AIS dipole and  
211 its contribution to the far-field potential, we decided to further corroborate  
212 the consequences of the “critical resistive coupling” with a simplified electric  
213 dipole model. We reduced the model to a cylindrical soma and an axon. All

214 Nav and K channels were placed in the AIS modelled as a 5- $\mu\text{m}$ -long segment  
215 of the axon located 45  $\mu\text{m}$  distally from the soma. We have shown previously  
216 (Telenczuk et al., 2017) that this model approximates well the dipolar field  
217 also observed in the detailed morphological model described above (Fig. 7).

218 We calculated the extracellular potential generated by this model neuron  
219 along a line that extended from the soma-AIS axis (Fig. 8A). The amplitude  
220 of the EAP decayed monotonically with the distance from the soma (Fig.  
221 8B). We repeated the calculation for three different distances of AIS from  
222 the soma (0, 20 and 45  $\mu\text{m}$ ), in all cases we saw similar decay with the  
223 recording distance; the absolute amplitudes of EAP depended only slightly  
224 on the AIS position (color lines in Fig. 8B). To determine the law of EAP  
225 amplitude decay, we fitted a linear function in double logarithmic scale (i.e.  
226 both the amplitude and recording distance,  $r$ , were log-transformed). The  
227 slope of this function provided the estimate of the power law scaling ( $k$  in  
228  $r^k$  relation). We found that the EAP amplitude decayed with the inverse  
229 square of the distance from the soma ( $k \approx -2$ , Fig. 8C). This inverse-square  
230 law is theoretically predicted by a dipole, when the distance to the dipole is  
231 much greater than the separation between the current source and sink (far-  
232 field approximation, Fig. 9) (Griffiths, 1999; Nunez and Cutillo, 1995). Note  
233 also that the profile of the potential obtained in detailed morphology models  
234 did not agree with this prediction. As discussed above the potential in these  
235 models changes non-monotonically with the distance from soma (Fig. 5B),  
236 likely due to the contribution of dendritic compartments dominating EAP at

237 low frequencies.

### 238 **EAP amplitude weakly depends on the distance of AIS from soma**

239 We next investigated whether the AIS position can influence the amplitude  
240 of the EAP. The amplitude of the far-field dipole potential measured at fixed  
241 position depends on the product between the dipole current ( $I$ , axial current  
242 between soma and AIS) and separation between the poles ( $d$ , the distance  
243 from soma to the AIS; Fig. 9). Therefore, increasing the distance of the  
244 AIS from soma might increase the amplitude of the EAP, but numerical  
245 simulations of the simplified soma/AIS model showed only weak dependence  
246 of the EAP amplitude on the AIS position (Fig. 8).

247 To explain this finding, we investigated the effect of the AIS position  
248 on the axial current generated during the action potential. We found that  
249 the amplitude of the axial current decreased with the inverse of the distance  
250 between the AIS and the soma,  $l$  (Fig. 10A). Indeed, we found that it was  
251 possible to fit a straight line of slope  $a = -1$  through the points representing  
252 the logarithm of the maximum axial current versus the logarithm of the soma-  
253 AIS distance (Fig. 10B). This linear relation confirms that the amplitude  
254 of the axial current is inversely proportional to the distance between the  
255 soma and the AIS,  $I_{axial} \sim 1/l$ . Such a relationship is also predicted by the  
256 resistive coupling hypothesis (Hamada et al., 2016). This drop of current  
257 magnitude compensates for the increase between the sink and source of the  
258 dipole (soma and AIS). Since the product of current intensity,  $I$ , and the

259 dipole dimension,  $d$ , remains constant, the EAP amplitude does not depend  
260 on the AIS position.

### 261 **EAP broadens with AIS distance from soma**

262 To study the effect of the AIS position on the EAP width, we calculated  
263 the extracellular potential generated by models with the AIS placed at ten  
264 different positions from the end of the soma, up to 45  $\mu\text{m}$  distally. We  
265 observed that the EAPs become gradually wider with increasing distance  
266 between the soma and the AIS (Fig. 11B), while the shapes of intracellu-  
267 lar waveforms remain similar (Fig. 11A, insets). The functional form of  
268 this dependence changes only slightly with the location of the recording  
269 site (Fig. 11B, dashed vs. solid line).

## 270 **Discussion**

271 Using detailed morphological models of reconstructed neurons and simplified  
272 soma-axon models we have shown that extracellular action potentials can be  
273 reconstructed from the current dipole formed by the soma and AIS at their  
274 initiation. We also show that the EAP shape depends on the position of the  
275 recording electrode with respect to the neuron promoting the extracellular  
276 contribution of different compartments of the neuron. In addition, while the  
277 width of the EAPs varies with the distance between the soma and the AIS,  
278 their amplitudes remain relatively constant.

279 The contribution of the AP to the extracellular field is shaped by the  
280 structure of the dendritic tree and the site of AP initiation. A large body  
281 of experimental data support the more distal initiation in the axon initial  
282 segment (Palmer and Stuart, 2006), but the impact of axonal initiation on  
283 the EAP had not been examined before. Using simplified models we showed  
284 that in the initial phase of the AP, the soma and AIS form a current dipole,  
285 whose contribution to the electric field decays inversely with the square of  
286 the distance from the dipole. At large distances (far-field approximation)  
287 the dipole contribution to the extracellular field does not depend on the  
288 separation between the AIS and the soma. In contrast, the width of the EAP  
289 increases with the soma/AIS separation. This soma-AIS dipole is different  
290 from the soma-dendrites dipole known from standard models (Gold et al.,  
291 2006). In fact, we showed that reducing the density of sodium channels in the  
292 AIS shifts AP initiation to the soma and as a consequence the extracellular  
293 potential is dominated by the soma-dendrites contribution.

294 Our results provide an important insight into the understanding of EAPs.  
295 It is known that the shape and the amplitude of the extracellular action po-  
296 tentials vary depending on the location of the recordings (Gold et al., 2006).  
297 Also, different types of neurons display extracellular action potentials of dif-  
298 ferent width, such as excitatory cells, which tend to have broader extracellu-  
299 lar action potentials when compared with interneurons (Barthó et al., 2004;  
300 McCormick et al., 1985), although there are exceptions (Vigneswaran et al.,  
301 2011). To separate action potentials of multiple neurons recorded extracel-

302 lularly, it is common to use the waveform features of an extracellular action  
303 potential, such as the half-widths of the positive and negative peaks, the  
304 interval between them and the difference of their amplitudes (Lewicki, 1998;  
305 Einevoll et al., 2012). In addition, these and other waveform features some-  
306 times allow the identification of neurons of different types (Peyrache et al.,  
307 2012; Dehghani et al., 2016). However, the significance of such features and  
308 their biophysical underpinnings are not completely understood. Numerical  
309 simulations of the extracellular field around reconstructed morphology of  
310 CA1 pyramidal neurons showed that the width of the extracellular action  
311 potential increases proportionally with the distance between the soma and  
312 the recording electrode (Gold et al., 2006). In addition, in this study the  
313 shape and amplitude of the extracellular potential was strongly affected by  
314 the channel densities in the dendrites and in the axon initial segment. In our  
315 work we show that the extracellular features of action potentials depend also  
316 on the exact location of their initiation site.

317 Finally, our results show that it should be possible, and of great interest,  
318 to follow experimentally the dynamic change of the AIS position by means  
319 of extracellular recordings. The length and distance of AIS from soma vary  
320 between neurons of same and different types (Fried et al., 2009; Kuba et al.,  
321 2006). Furthermore, the AIS is plastic and its length and position can change  
322 as a result of elevated activity which could occur due to plastic changes in  
323 a time scale of hours (Evans et al., 2015) to days (Grubb and Burrone,  
324 2010; Evans et al., 2013; Muir and Kittler, 2014). This also happens as a



325 consequence of a disease such as a stroke (Hinman et al., 2013; Schafer et al.,  
326 2009). Therefore, we expect that the shape of the EAP will vary according to  
327 the position of the AIS, such that long-term recordings from the same neuron  
328 could show gradual increase of the AP width. Since, the plasticity of AIS  
329 was never studied *in vivo* from intact neurons, this may open new methods  
330 of visualising such dynamic changes and investigating their functional role.

331 Our results are consistent with the large variability of EAP waveforms  
332 recorded *in vivo* (Fee et al., 1996; Harris et al., 2000). It is known that the  
333 waveshapes of the EAP depend on the position of the electrode, the mor-  
334 phology of the neuron and the densities of ion channels (Gold et al., 2007;  
335 Henze et al., 2000; Barthó et al., 2004; Pettersen and Einevoll, 2008). In  
336 particular, the presence of positive initial peak, as observed in our model,  
337 has been recognised in some studies (Palmer and Stuart, 2006). To further  
338 test our model experimentally, one could record the extracellular potential  
339 *in vitro* at multiple sites using multi-shank electrodes co-registered with the  
340 position of the soma and AIS. The AIS can be localised using fluorescent  
341 sodium channel markers (such as CoroNa) or immunostaining (for example,  
342 anykrin G is specific to AIS and nodes of Ranvier) (Zhou et al., 1998). This  
343 setup might allow for testing two new predictions of the model: 1) the pres-  
344 ence of positive peak at the beginning of the EAP in the vicinity of soma-AIS  
345 region; 2) the width of the EAP as a function of the position of the AIS. In  
346 the latter case, we would need to visualise the change of AIS position dynam-  
347 ically probably over the course of many hours or days (Grubb et al., 2011).

348 Such recordings are technically challenging, but are possible using present  
349 technology (Grubb and Burrone, 2010).

350 At the population level, the contribution of neurons to the local field po-  
351 tential (LFP) depends critically on the presence of voltage-dependent chan-  
352 nels and neuronal morphology. For example, during the up state the LFP  
353 contains larger contributions from the active potassium and sodium currents  
354 than from synaptic currents (Reimann et al., 2013); similarly active conduc-  
355 tances in the dendrites were shown to have major impact on the spectrum of  
356 the field potential (Ness et al., 2016). The structure of the dendritic tree has  
357 also been implicated in the generation of LFP signals (Lindén et al., 2010).  
358 Results in the present work suggest that the biophysics of the axon and the  
359 site of the action potential initiation may be additional factors determining  
360 the amplitude and the spectrum of the extracellular potential. The effects of  
361 the AIS position on LFP generated from a network of multi-compartmental  
362 model neurons is an interesting outlook of the present work.

## 363 **Acknowledgements**

364 We thank Jennifer Goldman and Fabrizio Gabbiani for their comments on the  
365 manuscript. Research supported by the CNRS, the European Union (Human  
366 Brain Project H2020-720270), and the Agence Nationale de la Recherche  
367 (ANR-14-CE13-0003). MT was supported by Ecole des Neurosciences de  
368 Paris (ENP, [http://www.paris- neuroscience.fr/](http://www.paris-neuroscience.fr/)) and DIM Cerveau et Pensée

369 (<http://dimcerveaupensee.fr/>).

## 370 **References**

371 Barthó, P., Hirase, H., Monconduit, L., Zugaro, M., Harris, K. D., and  
372 Buzsáki, G. (2004). Characterization of neocortical principal cells and in-  
373 terneurons by network interactions and extracellular features. *Journal of*  
374 *neurophysiology*, 92(1):600–608.

375 Barthó, P., Hirase, H., Monconduit, L., Zugaro, M., Harris, K. D., and  
376 Buzsáki, G. (2004). Characterization of neocortical principal cells and in-  
377 terneurons by network interactions and extracellular features. *Journal of*  
378 *Neurophysiology*, 92(1):600–608.

379 Bédard, C., Kröger, H., and Destexhe, A. (2004). Modeling extracellular  
380 field potentials and the frequency-filtering properties of extracellular space.  
381 *Biophysical journal*, 86(3):1829–1842.

382 Brette, R. (2013). Sharpness of spike initiation in neurons explained by  
383 compartmentalization. *PLoS computational biology*, 9(12).

384 Dehghani, N., Peyrache, A., Telenczuk, B., Van Quyen, M. L., Halgren, E.,  
385 Cash, S. S., Hatsopoulos, N. G., and Destexhe, A. (2016). Dynamic balance  
386 of excitation and inhibition in human and monkey neocortex. *Scientific*  
387 *Reports*, 6(23176):1–12.

- 388 Einevoll, G. T., Franke, F., Hagen, E., Pouzat, C., and Harris, K. D. (2012).  
389 Towards reliable spike-train recordings from thousands of neurons with mul-  
390 tielectrodes. *Current Opinion in Neurobiology*, 22(1):11–17.
- 391 Evans, M. D., Dumitrescu, A. S., Kruijssen, D. L. H., Taylor, S. E., and  
392 Grubb, M. S. (2015). Rapid modulation of axon initial segment length  
393 influences repetitive spike firing. *Cell Reports*, 13(6):1233–1245.
- 394 Evans, M. D., Sammons, R. P., Lebron, S., Dumitrescu, A. S., Watkins,  
395 T. B., Uebele, V. N., Renger, J. J., and Grubb, M. S. (2013). Calcineurin  
396 signaling mediates activity-dependent relocation of the axon initial segment.  
397 *Journal of Neuroscience*, 33(16):6950–6963.
- 398 Fee, M. S., Mitra, P. P., and Kleinfeld, D. (1996). Variability of extra-  
399 cellular spike waveforms of cortical neurons. *Journal of Neurophysiology*,  
400 76(6):3823–3833.
- 401 Fried, S. I., Lasker, A. C. W., Desai, N. J., Eddington, D. K., and Rizzo,  
402 J. F. (2009). Axonal sodium-channel bands shape the response to electric  
403 stimulation in retinal ganglion cells. *Journal of neurophysiology*, 101:1972–  
404 1987.
- 405 Gold, C., Henze, D. A., and Koch, C. (2007). Using extracellular action  
406 potential recordings to constrain compartmental models. *Journal of Com-  
407 putational Neuroscience*, 23(1):39–58.

- 408 Gold, C., Henze, D. A., Koch, C., and Buzsáki, G. (2006). On the origin of  
409 the extracellular action potential waveform: A modeling study. *Journal of*  
410 *Neurophysiology*, 95:3113–3128.
- 411 Griffiths, D. (1999). *Introduction to Electrodynamics*. Prentice Hall.
- 412 Grubb, M. S. and Burrone, J. (2010). Activity-dependent relocation  
413 of the axon initial segment fine-tunes neuronal excitability. *Nature*,  
414 465(7301):1070–4.
- 415 Grubb, M. S., Shu, Y., Kuba, H., Rasband, M. N., Wimmer, V. C., and  
416 Bender, K. J. (2011). Short- and Long-Term Plasticity at the Axon Initial  
417 Segment. *Journal of Neuroscience*, 31(45):16049–16055.
- 418 Hallermann, S., de Kock, C. P. J., Stuart, G. J., and Kole, M. H. P. (2012).  
419 State and location dependence of action potential metabolic cost in cortical  
420 pyramidal neurons. *Nature Neuroscience*, 15(7):1007–1014.
- 421 Hamada, M. S., Goethals, S., de Vries, S. I., Brette, R., and Kole, M.  
422 H. P. (2016). Covariation of axon initial segment location and dendritic  
423 tree normalizes the somatic action potential. *Proceedings of the National*  
424 *Academy of Sciences*, 113(51):14841–14846.
- 425 Harris, K. D., Henze, D. A., Csicsvari, J., Hirase, H., and Buzsáki, G. (2000).  
426 Accuracy of tetrode spike separation as determined by simultaneous in-  
427 tracellular and extracellular measurements. *Journal of Neurophysiology*,  
428 84(1):401–414.

- 429 Henze, D. A., Borhegyi, Z., Csicsvari, J., Mamiya, A., Harris, K. D., and  
430 Buzski, G. (2000). Intracellular Features Predicted by Extracellular Record-  
431 ings in the Hippocampus In Vivo. *Journal of Neurophysiology*, 84(1):390–  
432 400.
- 433 Hines, M. L. and Carnevale, N. T. (1997). The neuron simulation environ-  
434 ument. *Neural computation*, 9(6):1179–1209.
- 435 Hines, M. L., Davison, A. P., and Muller, E. (2009). NEURON and Python.  
436 *Frontiers in Neuroinformatics*, 3:1.
- 437 Hinman, J. D., Rasband, M. N., and Carmichael, S. T. (2013). Remodeling  
438 of the axon initial segment after focal cortical and white matter stroke.  
439 *Stroke*, 44(1):182–189.
- 440 Holt, G. R. (1997). *A critical reexamination of some assumptions and im-  
441 plications of cable theory in neurobiology*. PhD thesis, California Institute  
442 of Technology.
- 443 Jun, J. J., Steinmetz, N. A., Siegle, J. H., Denman, D. J., Bauza, M.,  
444 Barbarits, B., Lee, A. K., Anastassiou, C. A., Andrei, A., Aydin, Ç., Barbic,  
445 M., Blanche, T. J., Bonin, V., Couto, J., Dutta, B., Gratiy, S. L., Gutnisky,  
446 D. A., Häusser, M., Karsh, B., Ledochowitsch, P., Lopez, C. M., Mitelut, C.,  
447 Musa, S., Okun, M., Pachitariu, M., Putzeys, J., Rich, P. D., Rossant, C.,  
448 Sun, W. L., Svoboda, K., Carandini, M., Harris, K. D., Koch, C., O’Keefe,

449 J., and Harris, T. D. (2017). Fully integrated silicon probes for high-density  
450 recording of neural activity. *Nature*, 551(7679):232–236.

451 Kuba, H., Ishii, T. M., and Ohmori, H. (2006). Axonal site of spike initiation  
452 enhances auditory coincidence detection. *Nature*, 444(7122):1069–1072.

453 Lewicki, M. S. (1998). A review of methods for spike sorting: the detection  
454 and classification of neural action potentials. *Network*, 9(4):R53–78.

455 Lindén, H., Pettersen, K. H., and Einevoll, G. T. (2010). Intrinsic dendritic  
456 filtering gives low-pass power spectra of local field potentials. *Journal of*  
457 *Computational Neuroscience*, 29(3):423–444.

458 McCormick, D. A., Connors, B. W., Lighthall, J. W., and Prince, D. a.  
459 (1985). Comparative electrophysiology of pyramidal and sparsely spiny stel-  
460 late neurons of the neocortex. *Journal of neurophysiology*, 54(4):782–806.

461 Milstein, J. N. and Koch, C. (2008). Dynamic moment analysis of the  
462 extracellular electric field of a biologically realistic spiking neuron. *Neural*  
463 *computation*, 20(8):2070–2084.

464 Muir, J. and Kittler, J. T. (2014). Plasticity of GABAA receptor diffusion  
465 dynamics at the axon initial segment. *Frontiers in cellular neuroscience*,  
466 8(June):151.

467 Naundorf, B., Wolf, F., and Volgushev, M. (2007). Neurophysiology:  
468 Hodgkin and Huxley model - still standing? *Nature*, 445(7123):E2–E3.

- 469 Ness, T. V., Remme, M. W. H., and Einevoll, G. T. (2016). Active sub-  
470 threshold dendritic conductances shape the local field potential. *Journal of*  
471 *Physiology*, 0(1):1–31.
- 472 Nunez, P. L. and Cutillo, B. A. (1995). *Neocortical dynamics and human*  
473 *EEG rhythms*. Oxford University Press, USA.
- 474 Nunez, P. L. and Srinivasan, R. (2006). *Electric fields of the brain: the*  
475 *neurophysics of EEG*. Oxford University Press, USA.
- 476 Palmer, L. M. and Stuart, G. J. (2006). Site of Action Potential Initiation  
477 in Layer 5 Pyramidal Neurons. *Journal of Neuroscience*, 26(6):1854–1863.
- 478 Pettersen, K. H. and Einevoll, G. T. (2008). Amplitude Variability and  
479 Extracellular Low-Pass Filtering of Neuronal Spikes. *Biophysical Journal*,  
480 94(3):784–802.
- 481 Peyrache, A., Dehghani, N., Eskandar, E. N., Madsen, J. R., Anderson,  
482 W. S., Donoghue, J. A., Hochberg, L. R., Halgren, E., Cash, S. S., and  
483 Destexhe, A. (2012). Spatiotemporal dynamics of neocortical excitation  
484 and inhibition during human sleep. *PNAS*, 109(5):1731–1736.
- 485 Reimann, M. W., Anastassiou, C. a., Perin, R., Hill, S. L., Markram, H.,  
486 and Koch, C. (2013). A biophysically detailed model of neocortical local field  
487 potentials predicts the critical role of active membrane currents. *Neuron*,  
488 79(2):375–90.



489 Schafer, D. P., Jha, S., Liu, F., Akella, T., McCullough, L. D., and Rasband,  
490 M. N. (2009). Disruption of the axon initial segment cytoskeleton is a  
491 new mechanism for neuronal injury. *Journal of neuroscience*, 29(42):13242–  
492 13254.

493 Stevenson, I. H. and Kording, K. P. (2011). How advances in neural record-  
494 ing affect data analysis. *Nature Neuroscience*, 14(2):139–142.

495 Stuart, G., Schiller, J., and Sakmann, B. (1997a). Action potential ini-  
496 tiation and propagation in rat neocortical pyramidal neurons. *Journal of*  
497 *Physiology*, 505(3):617–632.

498 Stuart, G., Spruston, N., Sakmann, B., and Häusser, M. (1997b). Action  
499 potential initiation and backpropagation in neurons of the mammalian cns.  
500 *Trends in neurosciences*, 20(3):125–131.

501 Telenczuk, B., Baker, S. N., Kempster, R., and Curio, G. (2015). Correlates  
502 of a single cortical action potential in the epidural EEG. *NeuroImage*,  
503 109:357–367.

504 Telenczuk, B. and Telenczuk, M. (2016). NeuronEAP library. *Zenodo*,  
505 10.5281/zenodo.49560.

506 Telenczuk, M., Fontaine, B., and Brette, R. (2017). The basis of sharp spike  
507 onset in standard biophysical models. *PLOS ONE*, 12(4):1–27.

508 Vigneswaran, G., Kraskov, A., and Lemon, R. N. (2011). Large Identified  
509 Pyramidal Cells in Macaque Motor and Premotor Cortex Exhibit "Thin

510 Spikes”: Implications for Cell Type Classification. *Journal of Neuroscience*,  
511 31(40):14235–14242.

512 Wilson, M. and Bower, J. M. (1992). Cortical oscillations and temporal  
513 interactions in a computer simulation of piriform cortex. *Journal of Neuro-*  
514 *physiology*, 67(4):981–995.

515 Yu, Y., Shu, Y., and McCormick, D. A. (2008). Cortical action potential  
516 backpropagation explains spike threshold variability and rapid-onset kinet-  
517 ics. *The Journal of neuroscience*, 28(29):7260–72.

518 Zhou, D., Lambert, S., Malen, P. L., Carpenter, S., Boland, L. M., and  
519 Bennett, V. (1998). Ankyring Is Required for Clustering of Voltage-gated  
520 Na Channels at Axon Initial Segments and for Normal Action Potential  
521 Firing. *The Journal of Cell Biology*, 143(5):1295.

522 **Figures**

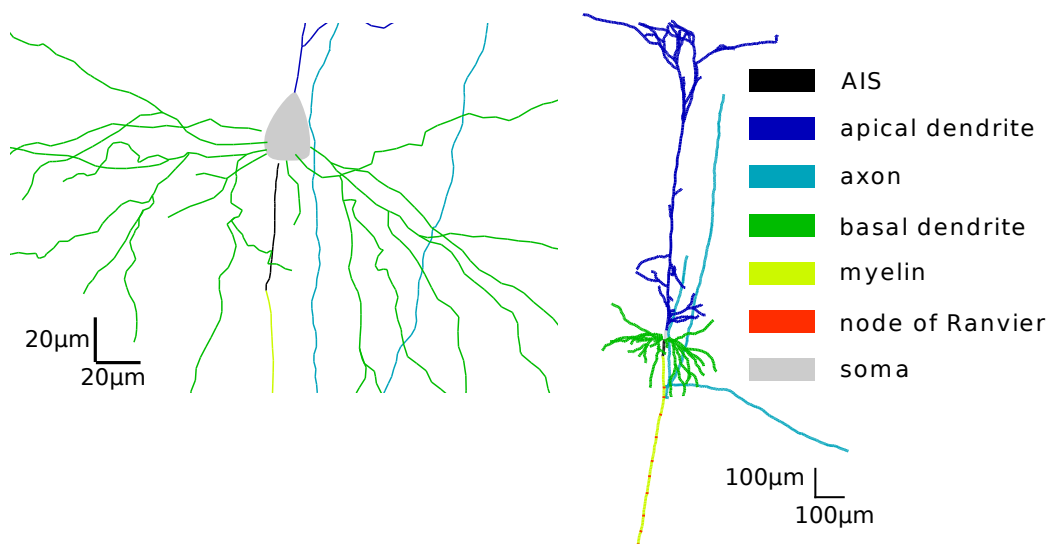

Figure 1: Morphology of the full compartmental model. Left: zoom into the AIS

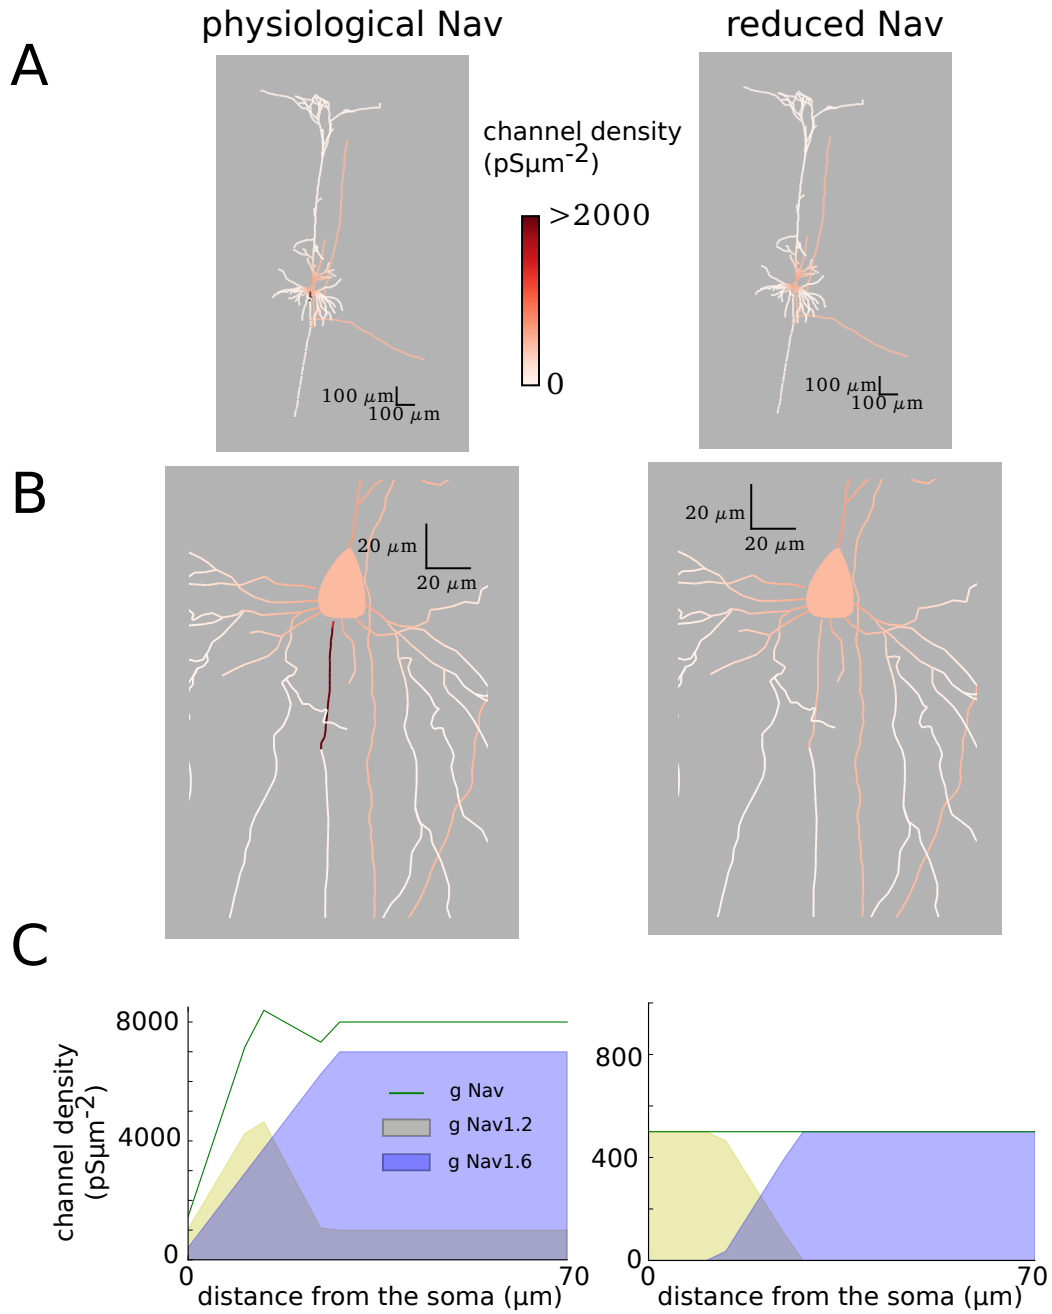

---

Figure 2 (*previous page*): Sodium distribution within the neuron. Color scale shows the channel conductance per membrane area. *Left*: Physiological Nav model, *Right*: Reduced Nav model. *A*: Full morphology. *B*: Zoom in into the soma and the initial segments of the axon. *C*: Concentrations of two different types of sodium channels (Nav1.2 and Nav1.6) in the AIS (at 0  $\mu m$  AIS is attached to the soma, 69.90  $\mu m$  is its far end). Note that in both models, the density of Nav1.2 channels in the soma is  $500 pS\mu m^{-2}$  while there are no Nav1.6 channels.

## A physiological Nav

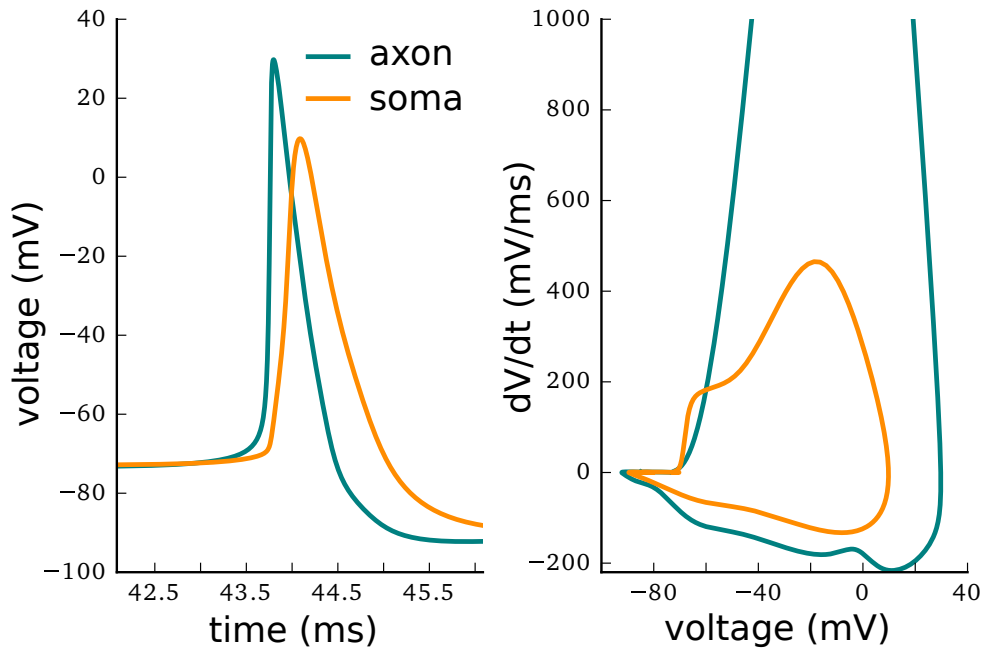

## B reduced Nav

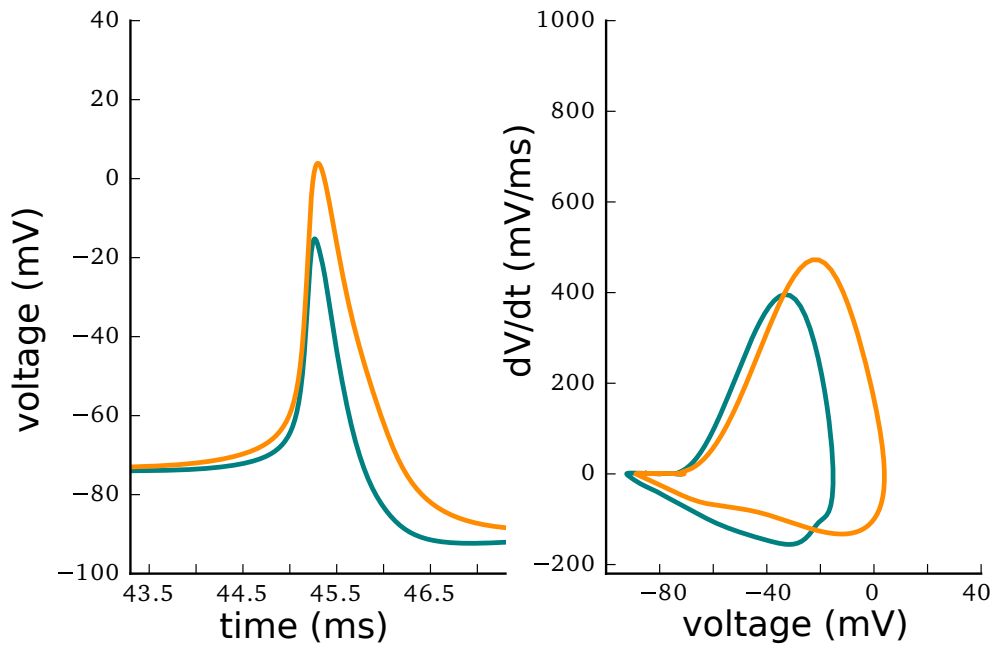

---

Figure 3 (*previous page*): Action potentials in two different locations: soma (orange) and AIS (blue). The AP is shown both in time domain (left) and in a phase-plot (right). *A*: Physiological Nav model. *B*: Reduced Nav model.

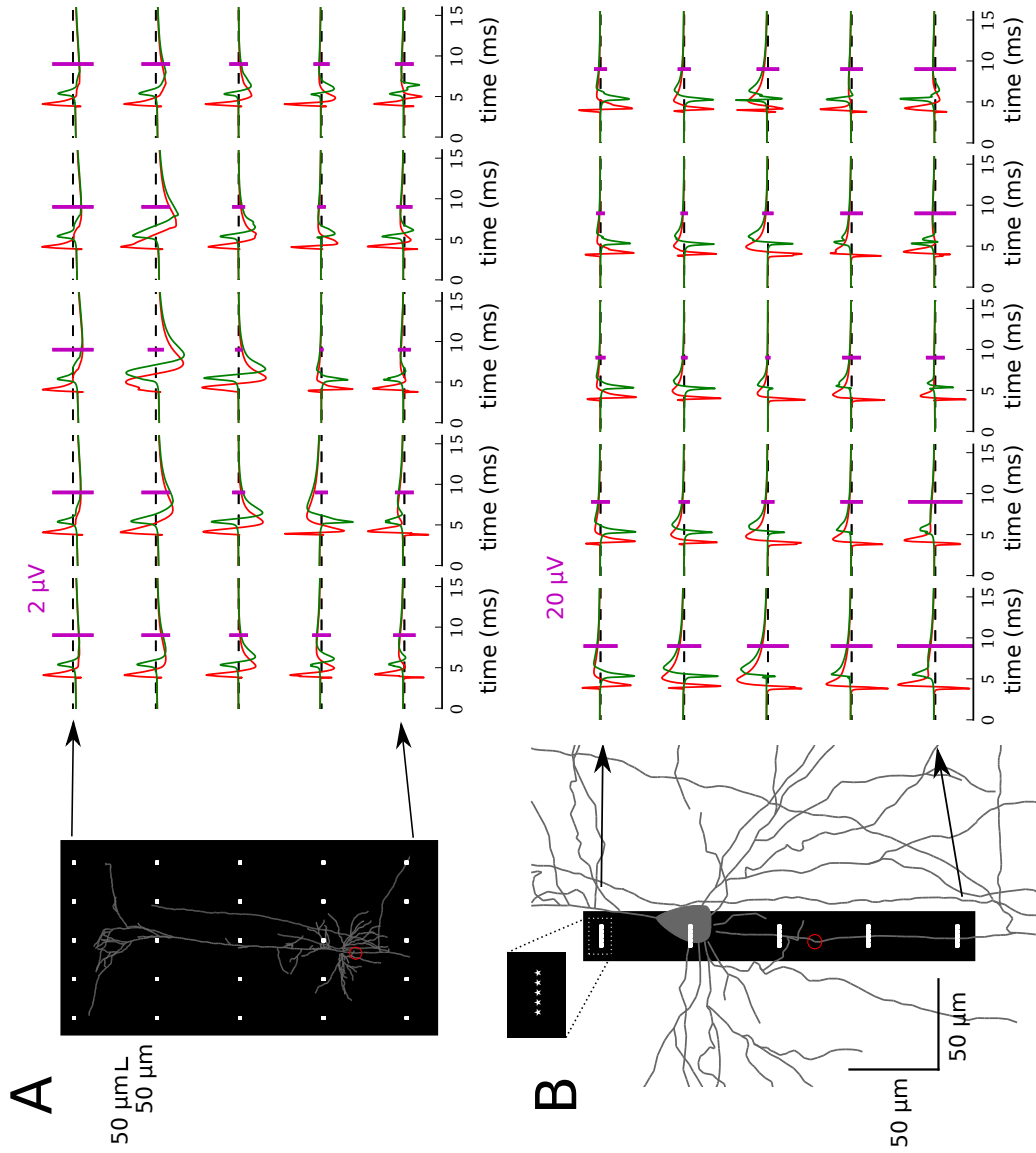



---

Figure 4 (*previous page*): Extracellular potential (right) measured at different locations (white dots within the black rectangle, left) for the physiological Nav model (red) and reduced Nav model (green). Scale bars (pink) of  $2 \mu V$  (A) and  $20 \mu V$  (B) are shown for each panel separately. The y-scale is adjusted in each panel separately for better visualisation of the EAPs. **A**, Full morphology and **B**, Zoom in to the soma and initial part of the axon. The distal end of the AIS is marked with a red circle (A-B).

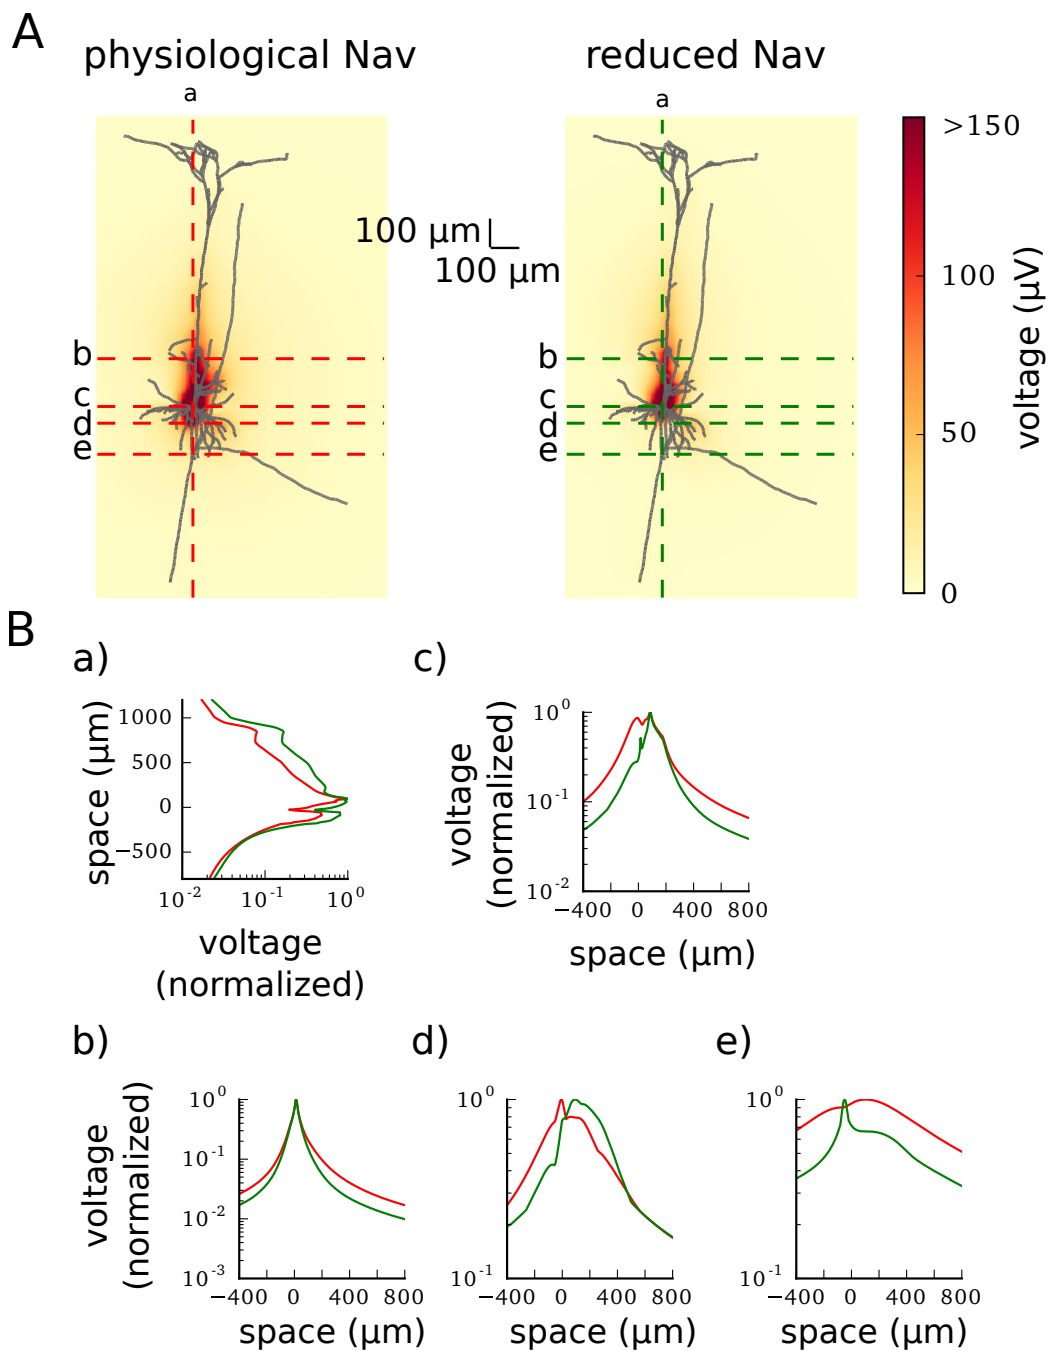

---

Figure 5 (*previous page*): Maximum peak-to-peak amplitude of the EAP calculated in the different places of the field. *A*: Full morphology imposed on the maximum EAP amplitude (heatmap, colorbar on the right) in the physiological Nav model (left) and reduced Nav model (right). The highest-amplitude EAPs are obtained in the somatic region of the neuron (dark red color in heat map, see also Figure 6 for a zoom-in). Dotted lines show the axes along which sub-panels (a)-(e) of (B) are calculated. Soma is centered at the position  $(0 \mu m, 0 \mu m)$ . *B*: Maximum peak-to-peak potential normalized to the largest value of the potential for each model separately. The potential is given in the logarithmic scale. (a) Signal recorded in the vertical axis passing through the soma, (b) signal recorded in the horizontal axis passing  $200 \mu m$  above the soma, (c) signal recorded in the horizontal axis passing through the soma, (d) signal recorded in the horizontal axis passing through the AIS, (e) signal recorded in the horizontal axis passing through  $200 \mu m$  below the soma.

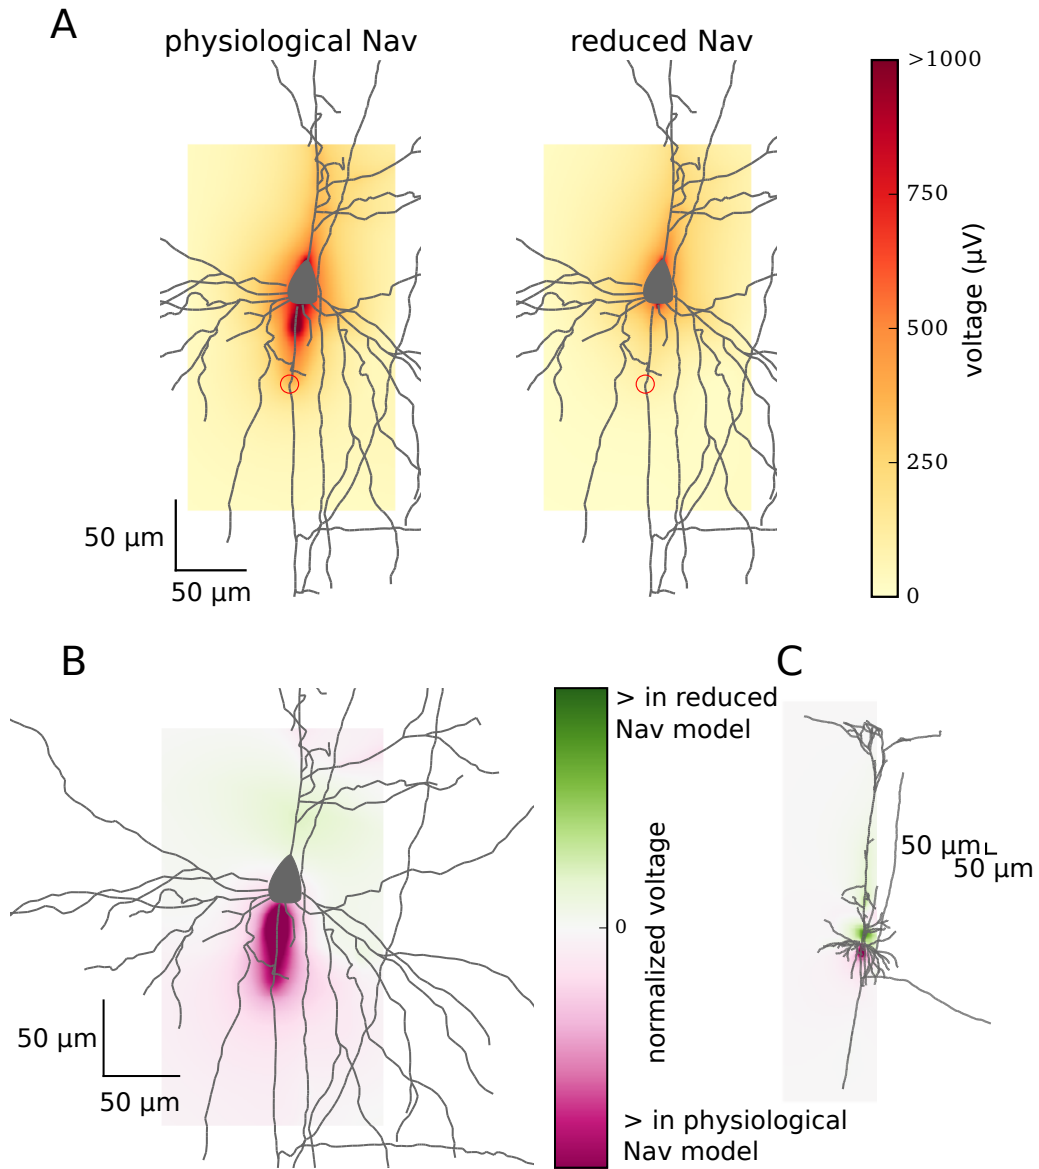

---

Figure 6 (*previous page*): Comparison of EAP amplitude in physiological and reduced Nav models. *A*: Zoom in to the maximum peak-to-peak amplitude of the EAP (shown as heatmap, colorbar is on the right-hand side) generated by the physiological Nav model (left) and reduced Nav model (right). The amplitude around AIS (red circles – distal end) is higher in the model with axonal initiation (physiological Nav model). *B-C*: Difference between normalized peak-to-peak amplitudes (heatmap, colorbar on the right) of the EAP obtained from physiological and reduced Nav models: the zoomed in view (*B*) and full morphology (*C*).

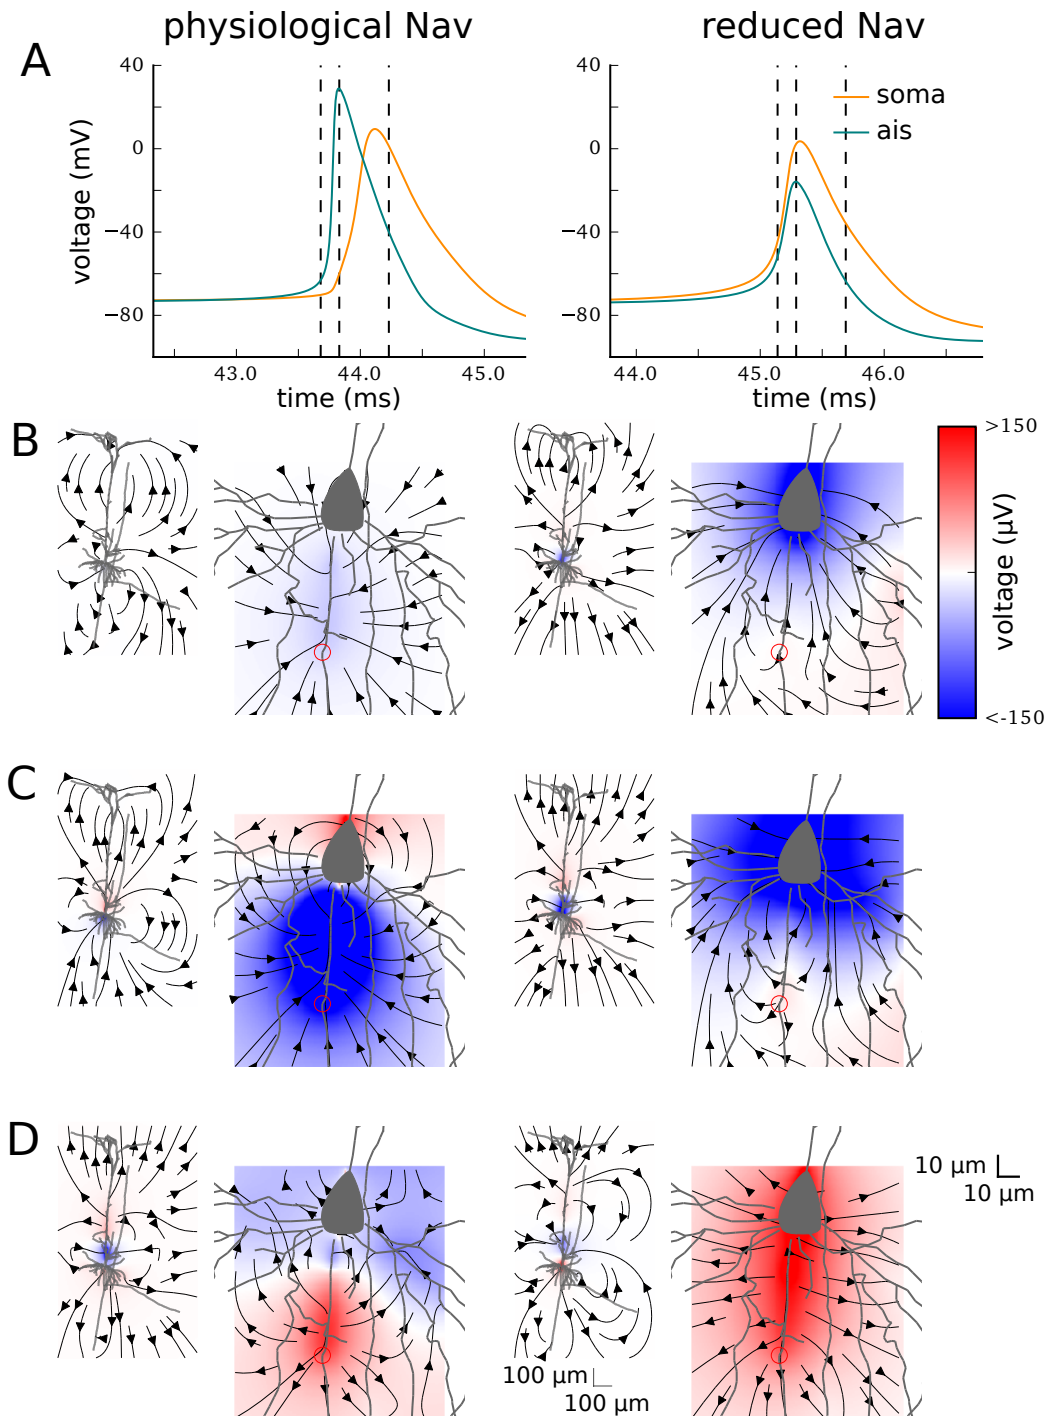

---

Figure 7 (*previous page*): EAP at different time points in the physiological Nav model (left) and reduced Nav model (right). **A**, Intracellular APs in the soma (orange) and in the end of the AIS (blue). Dotted vertical lines show at which time points B-D are recorded. **B–D**, Extracellular potential (colormap, see the colorbar on the right, red is positive and blue is negative) and electrical current (arrows) at different times of APs plotted for around whole morphology (left) and around the soma-AIS region (right). Recordings were made at: 0.15 ms before the peak of the AP in the AIS (B), at the peak of the AP in the AIS (C), 0.4 ms after the peak of the AP in the AIS (D). In the physiological Nav model the AP initiates in the AIS (red circles) giving rise to a dipolar potential (AIS-negative, soma-positive; C, left), which later reverses in polarity (AIS-positive, soma-negative; D, left). In contrast, reduced Nav model produces a large dipole that encompasses the axon, soma and proximal dendrites (soma-dendrites dipole).

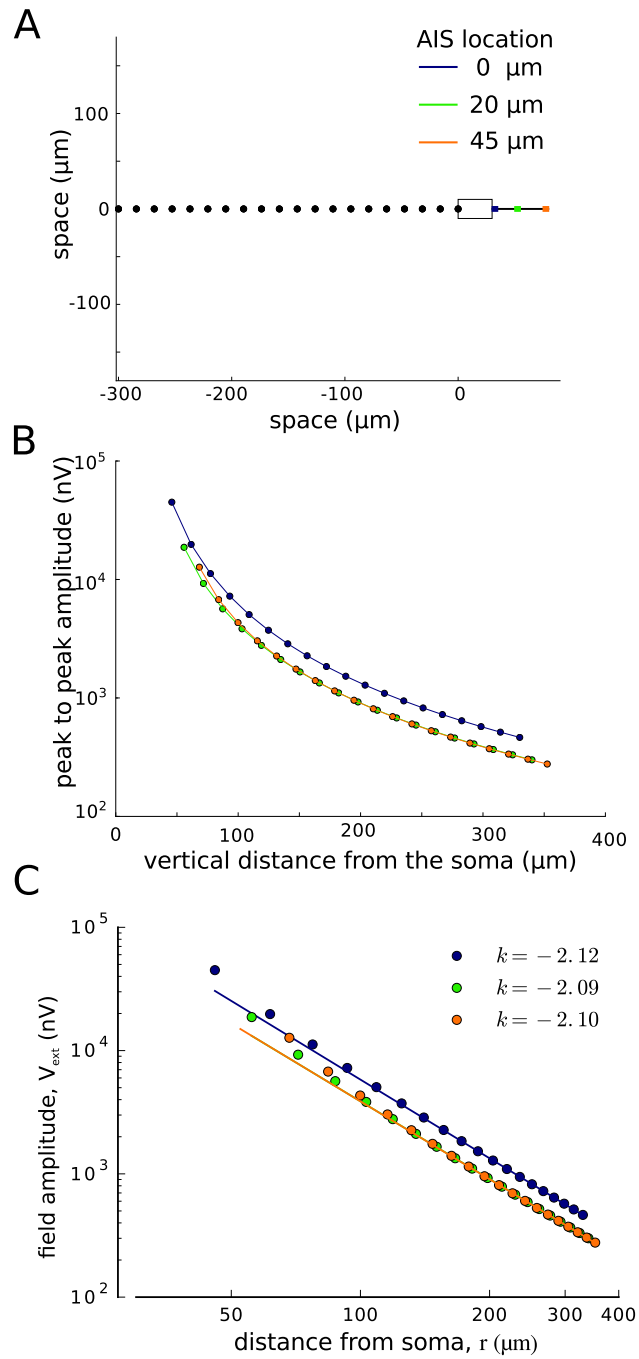

Figure 8



---

Figure 8 (*previous page*): Extracellular potential calculated from the soma-axon model with the AIS at three different positions: 0  $\mu\text{m}$  from the soma (blue), 20  $\mu\text{m}$  from the soma (green) and 45  $\mu\text{m}$  from the soma (orange). *A*: Each dot represents the location of the measurement horizontally from the soma. Schematics shows the cell body (left) and the axon (grey) with the AIS at different locations (color-coded). *B*: Logarithmic plot of the peak-to-valley amplitude of the extracellular potential vs the distance of the recording site from the soma. Color lines correspond to different positions of the AIS (see color code in *A*). *C*: The decay of far-field potential with distance is well approximated with a power law,  $r^k$ . The exponent,  $k$ , estimated from the slope of linear fit to the log-transformed potential and distance is close to -2 (the value of  $k$  estimated for each model is given in the legend).

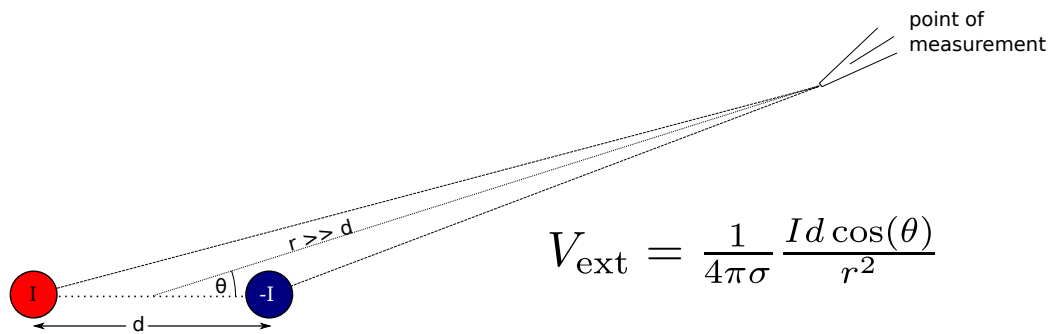

Figure 9: Dipole model consisting of a current sink (red) and a current source (blue) separated by  $d$ . Point of measurement represents a possible recording location where extracellular potential  $V_{ext}$  is recorded. For the far-field approximation to hold the distance from the dipole  $r$  should be much larger than the distance between the sink and source ( $d$ ). See text for more detail.  $I$  is current intensity,  $\sigma$  is extracellular medium conductivity, and  $\theta$  is the angle measured from the dipole axis.

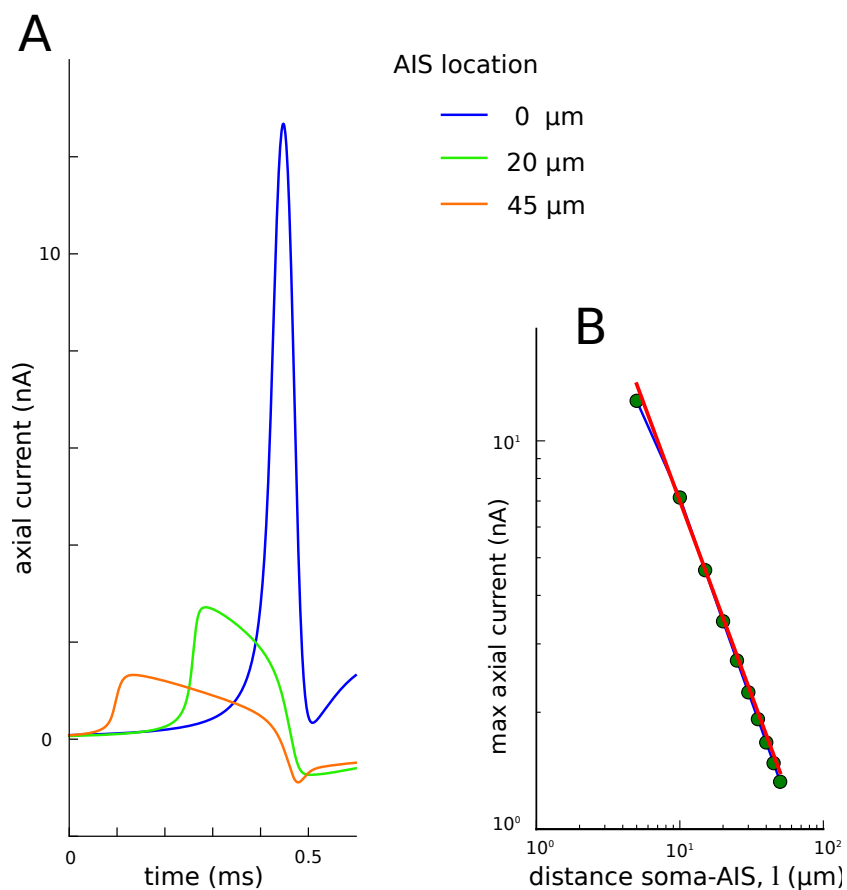

Figure 10: Dependence of axial current amplitude on the distance between the soma and the AIS in the soma-axon model. *A*: Axial current passing from the axon to the soma during the action potential, aligned to the peak of somatic AP (which is at 0.5 ms). *B*: The maximum of axial current vs the distance of the AIS end proximal to the soma in double-logarithmic scale. Red line shows the fitted function  $I_{axial} = (70 \text{ nA} \cdot \mu\text{m})/l$  (which is a linear function in double-logarithmic scale).

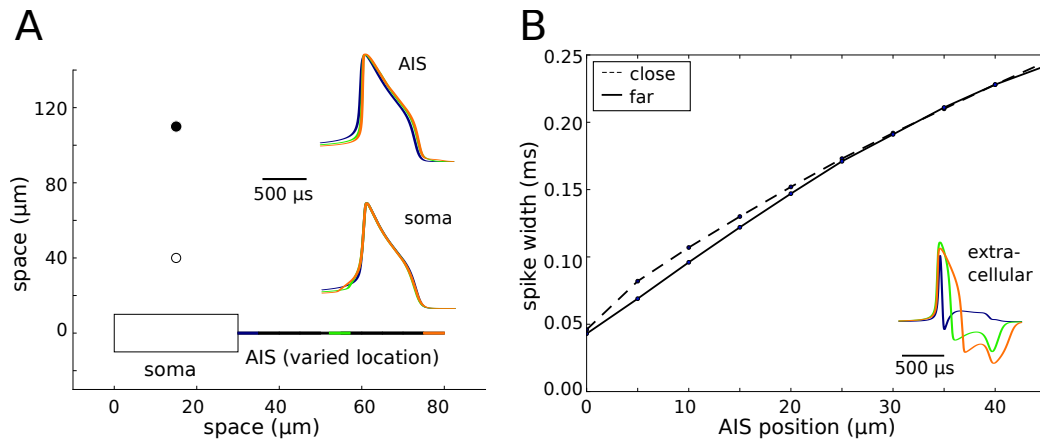

Figure 11: Width of the extracellular AP as a function of the soma–AIS separation. *A*: Schematic representation of the soma-axon model (bottom) and their relation to the recording points (dots above soma). The AIS position was systematically varied from 0 (directly attached to the soma) to 45  $\mu\text{m}$ . Insets: Waveforms of action potentials recorded intracellularly in the AIS (top inset) and the soma (bottom). The waveforms are normalized to the peak of somatic potential. *B*: Action potential width measured at half amplitude as a function of the AIS position for two different recording locations (close: 30  $\mu\text{m}$  from soma, far: 100  $\mu\text{m}$  from soma). Inset: Examples of extracellular AP waveshapes for 3 different locations of AIS (recorded 40  $\mu\text{m}$  above the soma).
